# Supplementary figures and images for: Transgenic neuronal overexpression reveals that stringently regulated p23 expression is critical for coordinated movement in mice
Source: Springer Nature journal article supplement (doi:10.1186/1750-1326-6-87), 2011-12-01

Additional File 6

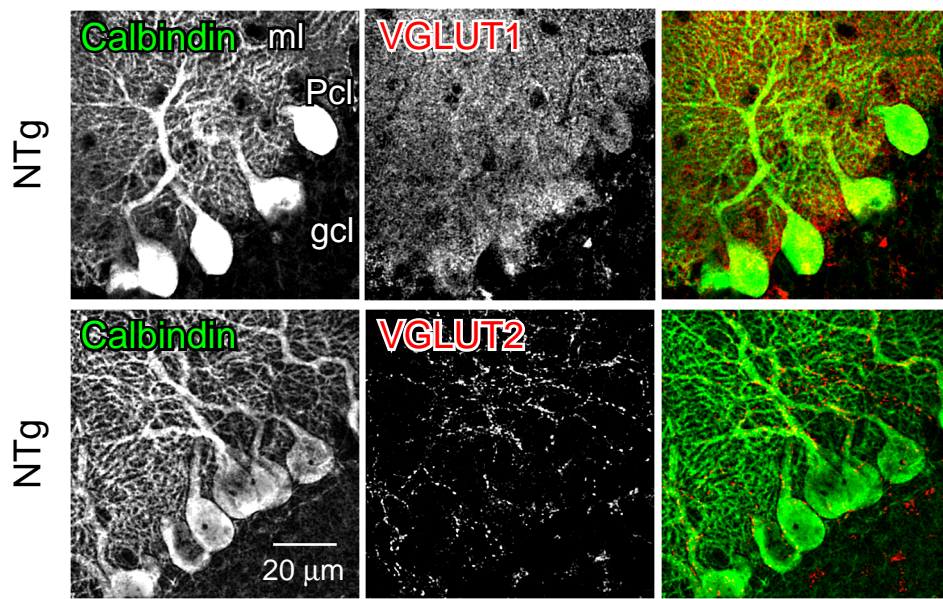

Supplement: Additional file 6 [file 1750-1326-6-87-s6.pdf]
